# Supplementary material for: Coronavirus Disease 2019 (COVID-19) Re-infection by a Phylogenetically Distinct Severe Acute Respiratory Syndrome Coronavirus 2 Strain Confirmed by Whole Genome Sequencing
Source: Oxford University Press journal article supplement (doi:10.1093/cid/ciaa1275), 2020-08-24
Supplement: ciaa1275_suppl_supplementary_figure_1.doc [file ciaa1275_suppl_supplementary_figure_1.doc]

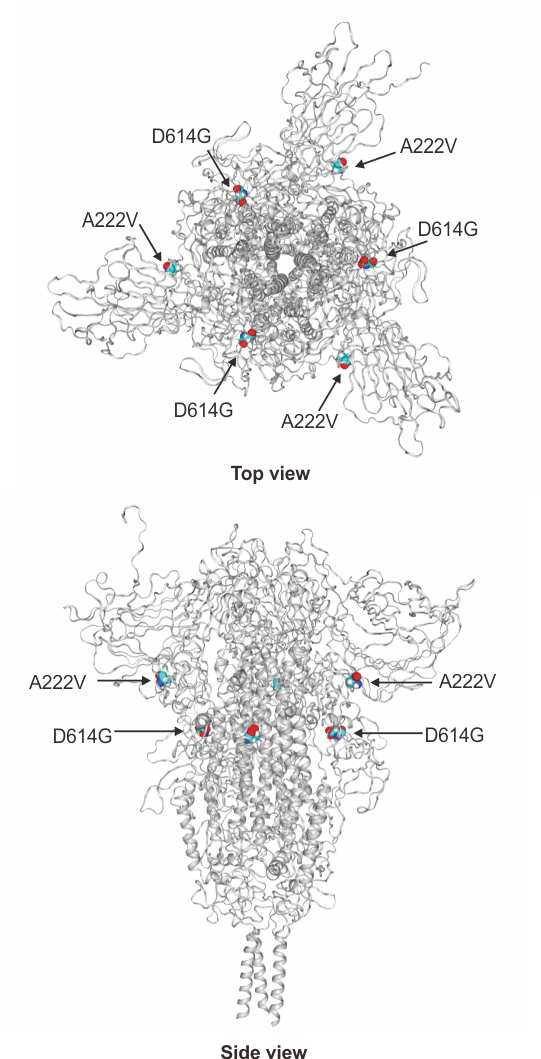


**Supplementary Figure S1**. The mutations (A222V and D614G) were highlighted in the SARS-CoV-2 Spike protein structure (6XR8). The structure with indicated mutations was visualized by CoV3D Mutation Viewer (cov3d.ibbr.umd.edu/MutViewer/). The Spike structure was shown as cartoon with grey color. The amino acid mutations were indicated by arrows.
