# Supplementary material for: Coronavirus Disease 2019 (COVID-19) Re-infection by a Phylogenetically Distinct Severe Acute Respiratory Syndrome Coronavirus 2 Strain Confirmed by Whole Genome Sequencing
Source: Oxford University Press journal article supplement (doi:10.1093/cid/ciaa1275), 2020-08-24
Supplement: ciaa1275_suppl_supplementary_table_2.doc [file ciaa1275_suppl_supplementary_table_2.doc]

**Supplementary Table S1**. Differences between the genome from the first and second infection

| **Gene name** | **Nucleotide** | | | **Amino acid** | | |
| --- | --- | --- | --- | --- | --- | --- |
|  | Positiona | 1st infection | 2nd infection | Position | 1st infection | 2nd infection |
| Non-coding region | 204 | G | T | - | - | - |
| 241 | C | T | - | - | - |
| Nsp1 | 445 | T | C | 60 | V | V |
| Nsp3 | 3037 | C | T | 106 | F | F |
| 6027 | T | C | 1103 | L | P |
| 6286 | C | T | 1189 | T | T |
| 6629 | T | C | 1304 | F | L |
| Nsp5 (3CLpro) | 10236 | G | A | 61 | R | K |
| Nsp6 | 11083 | T | G | 37 | F | L |
| 11396 | C | T | 142 | L | F |
| Nsp12 (RdRP) | 14408 | C | T | 323 | P | L |
| 14805 | T | C | 455 | Y | Y |
| Nsp13 (Helicase) | 17247 | C | T | 337 | R | R |
| Nsp16 | 21255 | G | C | 199 | A | A |
| Spike (NTD) | 21614 | C | T | 18 | L | F |
| 22227 | C | T | 222 | A | V |
| Spike (SD2) | 23403 | A | G | 614 | D | G |
| Spike (UH) | 23900 | C | G | 780 | Q | E |
| ORF3a | 26144 | T | G | 251 | V | G |
| M | 26801 | C | G | 93 | L | L |
| ORF8 | 27944 | C | T | 17 | H | H |
| 28083 | T | G | 64 | Stop | E |
| N | 28932 | C | T | 220 | A | V |
| ORF10 | 29645 | G | T | 30 | V | L |

Abbreviations: M, membrane; NTD, N: nucleoprotein; N-terminal domain; RdRp, RNA-dependent RNA polymerase; SD2, subdomain 2; UH, upstream helix

a The nucleotide position is numbered according the reference genome Wuhan-Hu-1 (GenBank accession number MN908947.3)
